# Supplementary material for: Doping the cage. Re@Au11Pt and Ta@Au11Hg, as novel 18-ve trimetallic superatoms displaying a doped icosahedral golden cage
Source: Royal Society of Chemistry journal article supplement (doi:10.1039/c6cp07519c), 2016-12-14
Supplement: c6cp07519c1.pdf [file c6cp07519c1.pdf]

# Doping the Cage. $\text{Re}@Au_{11}\text{Pt}$ and $\text{Ta}@Au_{11}\text{Hg}$ , As Novel 18-*ve* Trimetallic Superatoms Displaying a Doped Icosahedral Golden Cage

Alvaro Muñoz-Castro

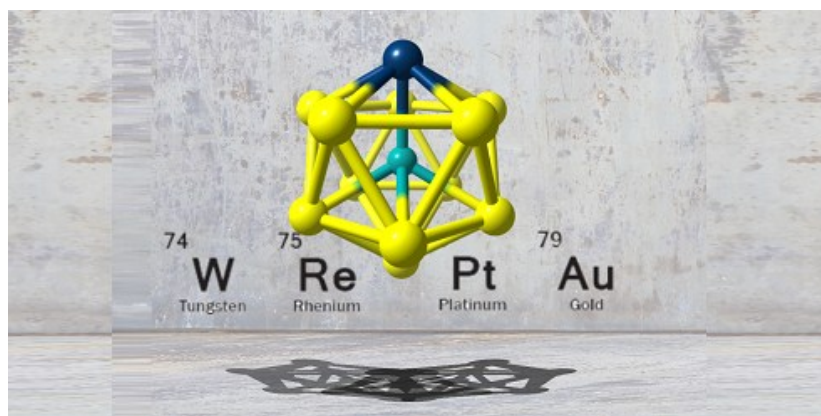

Content

Table S2. Coordinates (Å) of the optimized structures for  $\text{Re}@Au_{11}\text{Pt}$  and  $\text{Ta}@Au_{11}\text{Hg}$ .

Table S1. Atomic orbital analysis of the superatomic shells.

| Shell | W@Au <sub>12</sub> |       | Re@Au <sub>11</sub> Pt |       | Ta@Au <sub>11</sub> Hg |       |
|-------|--------------------|-------|------------------------|-------|------------------------|-------|
| 1d    | 5d-Au              | 32.0% | 5d-Au                  | 21.0% | 5d-Au                  | 19.3% |
|       | 6s-Au              | 40.6% | 6s-Au                  | 28.9% | 6s-Au                  | 27.3% |
|       |                    |       | 5d-Pt                  | 21.0% | 5d-Hg                  | 13.4% |
|       |                    |       | 6s-Pt                  | 9.0%  | 6s-Hg                  | 11.5% |
|       | 5d-W               | 27.4% | 5d-Re                  | 20.1% | 5d-Ta                  | 28.5% |
| 1p    | 5d-Au              | 32.1% | 5d-Au                  | 32.0% | 5d-Au                  | 20.2% |
|       | 6s-Au              | 54.2% | 6s-Au                  | 37.8% | 6s-Au                  | 44.8% |
|       |                    |       | 5d-Pt                  | 0.0%  | 5d-Hg                  | 8.3%  |
|       |                    |       | 6s-Pt                  | 17.6% | 6s-Hg                  | 7.4%  |
|       | 6p-W               | 13.7% | 6p-Re                  | 12.6% | 6p-Ta                  | 19.3% |
| 1s    | 5d-Au              | 3.2%  | 5d-Au                  | 1.6%  | 5d-Au                  | 1.3%  |
|       | 6s-Au              | 62.4% | 6s-Au                  | 59.0% | 6s-Au                  | 53.5% |
|       |                    |       | 5d-Pt                  | 1.3%  | 5d-Hg                  | 16.9% |
|       |                    |       | 6s-Pt                  | 5.7%  | 6s-Hg                  | 6.4%  |
|       | 6s-W               | 34.3% | 6s-Re                  | 32.4% | 6s-Ta                  | 32.0% |

Table S2. Coordinates (Å) of the optimized structures for Re@Au<sub>11</sub>Pt and Ta@Au<sub>11</sub>Hg.

13  
Re@Au<sub>11</sub>Pt

|    |              |              |              |
|----|--------------|--------------|--------------|
| Au | -0.751046000 | -2.311482000 | -1.207268000 |
| Au | -1.996634000 | 1.450640000  | 1.261579000  |
| Au | 1.966264000  | -1.428574000 | -1.207268000 |
| Au | 0.762646000  | 2.347184000  | 1.261579000  |
| Au | -1.996634000 | -1.450640000 | 1.261579000  |
| Au | 2.467976000  | 0.000000000  | 1.261579000  |
| Au | -2.430436000 | 0.000000000  | -1.207268000 |
| Au | 1.966264000  | 1.428574000  | -1.207268000 |
| Au | 0.762646000  | -2.347184000 | 1.261579000  |
| Au | 0.000000000  | 0.000000000  | -2.783428000 |
| Au | -0.751046000 | 2.311482000  | -1.207268000 |
| Pt | 0.000000000  | 0.000000000  | 2.531958000  |
| Re | 0.000000000  | 0.000000000  | 0.007221000  |

13  
Ta@Au<sub>11</sub>Hg

|    |              |              |              |
|----|--------------|--------------|--------------|
| Au | -1.993632000 | -1.271592000 | 1.459946000  |
| Au | -0.762169000 | 1.201487000  | -2.360171000 |
| Au | 0.760535000  | -1.260965000 | 2.347805000  |
| Au | 1.999337000  | 1.210030000  | -1.463106000 |
| Au | -2.478875000 | 1.203132000  | 0.011220000  |
| Au | 2.005693000  | 1.203762000  | 1.455348000  |
| Au | -1.995261000 | -1.265606000 | -1.450182000 |

|    |              |              |              |
|----|--------------|--------------|--------------|
| Au | 2.467413000  | -1.262814000 | -0.012916000 |
| Au | -0.766682000 | 1.214010000  | 2.355153000  |
| Au | 0.000910000  | -2.737101000 | 0.003779000  |
| Hg | -0.003218000 | 3.021001000  | -0.001739000 |
| Au | 0.765910000  | -1.273840000 | -2.345333000 |
| Ta | -0.002326000 | 0.018496000  | 0.000196000  |
